# Supplementary material for: Development and implementation of a strategy for intensified screening for gambiense human African trypanosomiasis in Kongo Central province, DRC
Source: PLoS Negl Trop Dis. 2020 Oct 15;14(10):e0008779. doi: 10.1371/journal.pntd.0008779 (PMC7591064; doi:10.1371/journal.pntd.0008779)
Supplement: S2 Data — (XLSX) [file pntd.0008779.s002.xlsx]

## Sheet: KC phase 1_ HAT Cases Spread
Health Zone	Haelth Area	Village	Passive Screening	Reactive Screening	Comments
Angola	-	Mbanza Kongo	1	NV	The health zone is unknown, Angola is the country of origin
Angola	-	Necuto (Cabinda)	1	NV	The health zone is unknown, Angola is the country of origin
Boma	Boma Ville	Boma	1	NV
Boma Bungu	Km 8	Km 8	2	NV
Boma Bungu	Kuidi	Findu	1	NV
Boma Bungu	Lovo	Buyana Fika	1	NV
Boma Bungu	Lovo	Km 39	1	0
Boma Bungu	Lovo	Mangala	0	8
Boma Bungu	Tsumba Kituti	Mami Village	0	0
Gombe Matadi	Kinkoni	Kinkenu	1	NV
Gombe Matadi	Kinkoni	Ngombe	1	NV
Gombe Matadi	Kinkoni	Ngombe I	0	0
Gombe Matadi	Kinkoni	Ntungu	1	NV
Gombe Matadi	Lukuakua	Kindamba	0	0
Gombe Matadi	Lukuakua	Sama	2	0
Gombe Matadi	Lukuakua Mbiti	Manzonzi	0	0
Gombe Matadi	Lukuakua Mbiti	Sama	1	NV
Gombe Matadi	Ntimansi	Banza Ngoyo	1	NV
Gombe Matadi	Ntimansi	Ntimansi	0	0
Inga	Kimvunza	Kimvunza	1	3
Inga	Kimvunza	Kizilutandi	2	NV
Inga	Kionzo Yalala	Boko 2	2	NV
Inga	Kionzo Yalala	Nkungi Matadi	0	0
Inga	Mvula Matadi	Courtoire	0	0
Inga	Mvula Matadi	Mvula Matadi	1	0
Inga	Mvula Matadi	Ntuta	0	0
Inga	Mvula Matadi	Vulamayidi	1	NV
Inga	Mvuzi	Mvuzi I	1	NV
Inga	Nsanda	Kimbala Zolele	0	0
Inga	Nsanda	Nsanda Centre	0	0
Inga	Nsanda	Nsanda Kikiama	0	0
Inga	Nsanda	Nsanda Kintata	0	0
Inga	Nsanda	Nsanda Kizulu	0	0
Inga	Vanga	Kimayemba	0	4
Inga	Vanga	Kindula	0	0
Inga	Vanga	Kingumva	0	0
Inga	Vanga	Kitsamba	0	0
Inga	Vanga	Kizabu	1	0
Inga	Vunda	Kuakua	3	11
Kangu	Tsanga Mbamba	Nganda Loangu	0	1
Kangu	Tsanga Mbamba	Vungu di Kuimba	0	1
Kibunzi	Kibunzi	Kibunzi	1	NV
Kibunzi	Kibunzi	Kiombe	1	NV
Kimpese	Kiansungua	Mpete	0	0
Kimpese	Kilueka	Kilueka	1	NV
Kimpese	Kimbaguiste	Cite Kimpese	6	3
Kimpese	Lukunga	Bonde	0	0
Kimpese	Lukunga	Chantier Malele	2	4
Kimpese	Lukunga	Kayikiampanga	0	0
Kimpese	Lukunga	Kiwembo	0	0
Kimpese	Lukunga	Kiyadi	0	0
Kimpese	Lukunga	Kondo Tamba	1	NV
Kimpese	Lukunga	Luenda Tamba	0	0
Kimpese	Lukunga	Nienge	0	0
Kimpese	Lukunga	Nkondo Tamba	0	0
Kimpese	Malanga	Malanga	1	7
Kimpese	Malanga	Mbombo	0	0
Kimpese	Malanga	Nkumba	0	0
Kimpese	Nkuanza	Kazankama	1	NV
Kimpese	Nkuanza	Kokodiya	1	3
Kimpese	Nkuanza	Paroisse Luenda Tamba	0	0
Kimpese	Songa Lumueno	Ngombe Yongo	1	NV
Kimpese	Viaza	Kiandu	2	3
Kimpese	Viaza	Lukuakua	0	0
Kimpese	Viaza	Nkondo	0	0
Kimpese	Viaza	Ntumba	0	1
Kimpese	Vila	Ntoni	0	0
Kimpese	Vila	Paza Nkama	0	0
Kimpese	Vila	Vila I	3	4
Kimpese	Vunda Nsole	Kavalu	1	0
Kimpese	Vunda Nsole	Sanzikua	0	0
Kimpese	Vunda Nsole	Zamba	0	0
Kwilu Ngongo	Lukala	Cite Lukala	1	NV
Kwilu Ngongo	Poste 24	Yanga Poste 24	1	NV
Kwilu Ngongo	Tumba mission	Tumba	1	NV
Kwilu Ngongo	Viaza 2	Kimbamba	1	NV
Lukula	Kinsundi 1	Kinsundi	0	1
Lukula	Kisundi 1	Cite Lemba	6	0
Lukula	Lukula	Cite Lukula	2	NV
Lukula	Patu	Cite Patu	2	NV
Luozi	Bandakani	Bandakani	0	0
Luozi	Bidi Kindamba	Kinguamba	1	0
Luozi	Kingoyi	Kitidi Tunga	0	0
Luozi	Kinsemi	Mbanza Bulu	1	0
Luozi	Yanga	Yanga	1	0
Luozi	Yanga Pompe	Kikiditunga	2	NV
Luozi	Yanga Pompe	Kimbambayulu	1	0
Luozi	Yanga Pompe	Kinkanga	1	0
Luozi	Yanga Pompe	Zolemeso	1	0
Mangembo	Mangembo	Mangembo	1	NV
Mangembo	Sundi Lutete	Kumbi	0	0
Mangembo	Sundi Lutete	Kumbi	1	NV
Muanda	Muanda A	Cité Muanda	1	NV
Nsona Mpangu	Kizulu	Kizoladio	0	0
Nsona Mpangu	Kizulu	Mawete	0	0
Nsona Mpangu	Kizulu	Mazinga	0	0
Nsona Mpangu	Mbanza Nkazi	Mbanza Nkazi	2	NV
Sekebanza	Kinzau A	Kikalu	2	NV
Sekebanza	Kinzau A	Kinzau Mvuete*	1	1	NV
Unknown	Unknown	Unknown	2	NV
		Total	81	55
* This village was not visited by the mobile team for the purpose of reactive screening. This case leaving Kinzau Vuete village was detected in another village in the neighbourwood subjected to reactive screening
NV: Not Visited by a mobile team (or mini-mobile team) for the purpose of reactive screening
